# Supplementary material
Source: PubMed Central journal article supplement (PMC4190586)

# Supplementary Figure 1

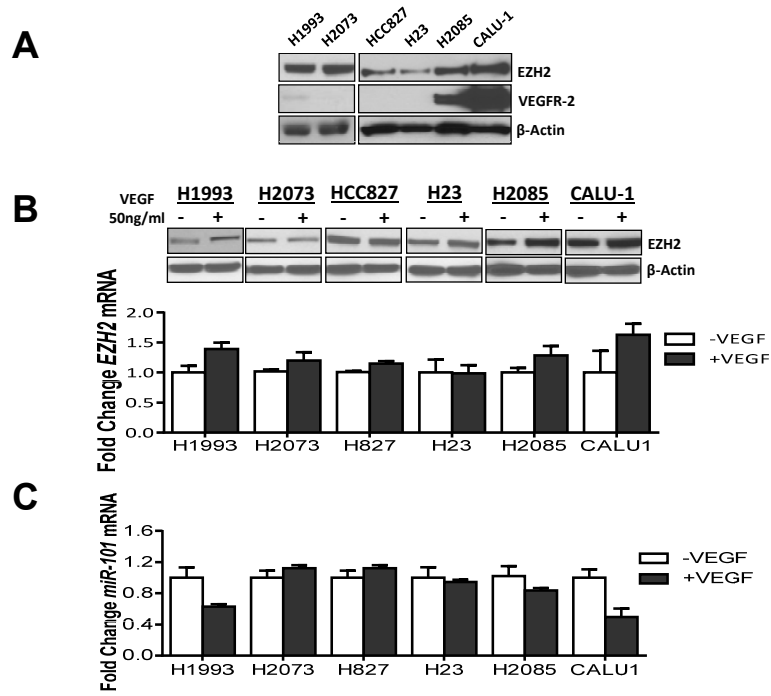

# Supplementary Figure 2

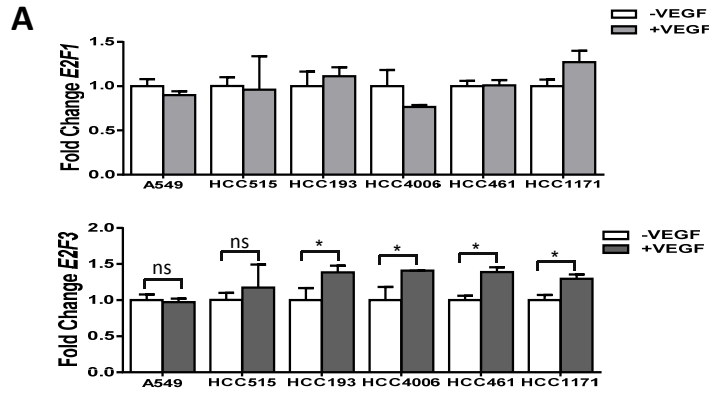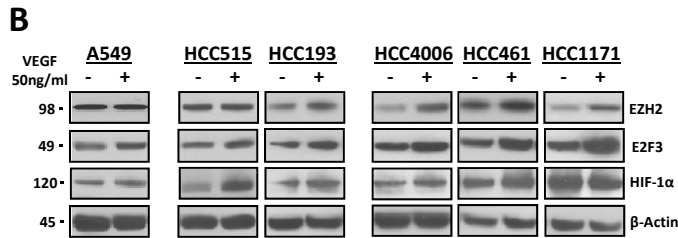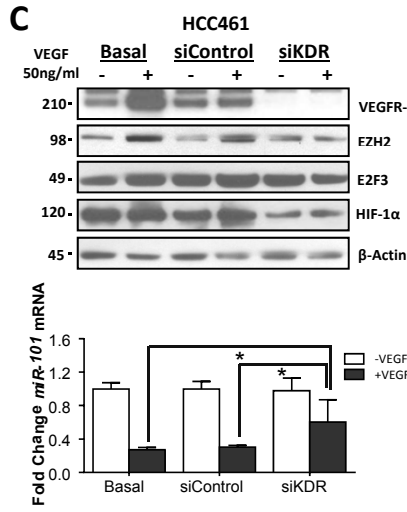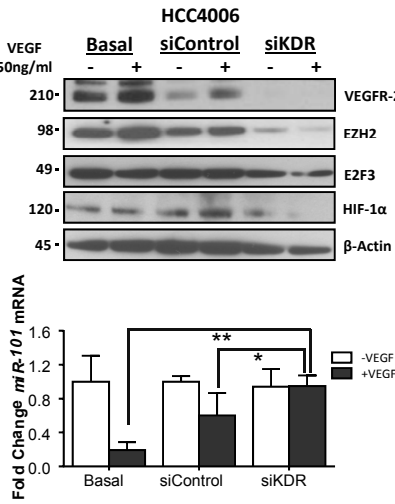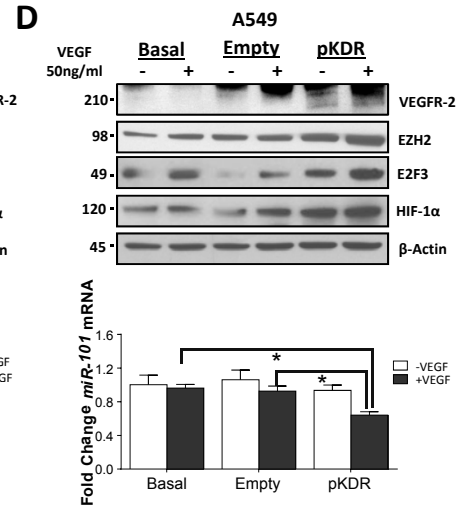

### Supplementary Figure 3

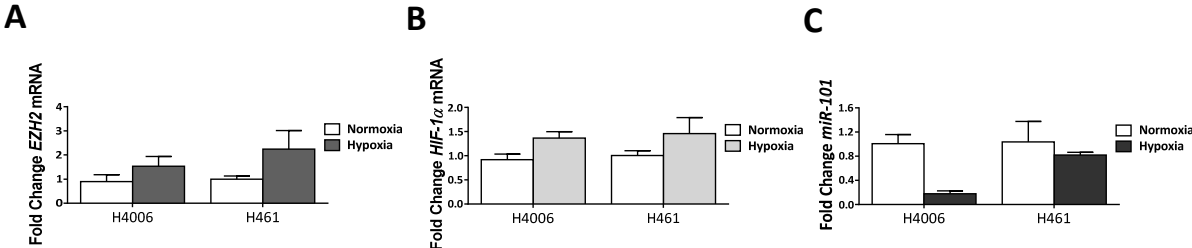

### Supplementary Figure 4

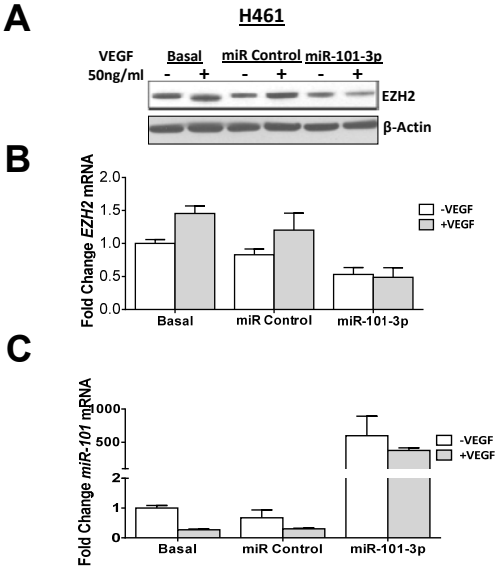

## Supplementary Figure 5

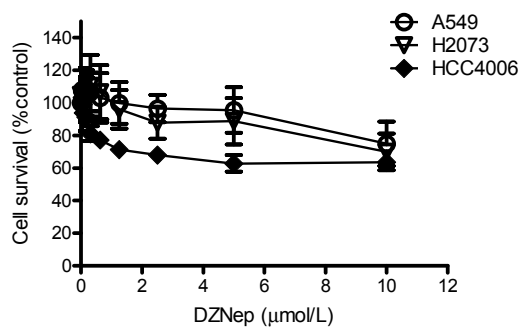

## Supplementary Figure 6

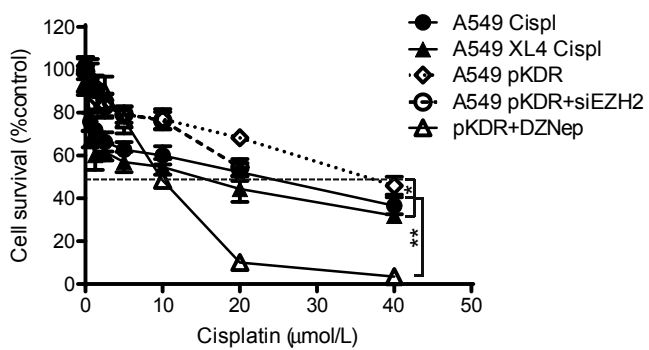

Supplement: NIHMS633165-supplement-Suppl_figs.pdf [file NIHMS633165-supplement-Suppl_figs.pdf]
