# Supplementary material
Source: PubMed Central journal article supplement (PMC4190586)
Supplement: NIHMS633165-supplement-Suppl_tables.pdf [file NIHMS633165-supplement-Suppl_tables.pdf]

**SupplementaryTable 1. Summary of the clinicopathological characteristics of the patients with lung adecarcinomas examined for *EZH2* and *miR-101* expressions (N=149)**

| Variable         | Category | Frequency Count | Percent of Total Frequency |
|------------------|----------|-----------------|----------------------------|
| Gender           | Female   | 73              | 48.99                      |
|                  | Male     | 76              | 51.01                      |
| Smoking Status   | Current  | 64              | 42.95                      |
|                  | Former   | 66              | 44.30                      |
|                  | Never    | 19              | 12.75                      |
| T Stage (IASLC)  | T1       | 45              | 30.20                      |
|                  | T2       | 74              | 49.66                      |
|                  | T3       | 25              | 16.78                      |
|                  | T4       | 5               | 3.36                       |
| N Stage (IASLC)  | N0       | 100             | 67.11                      |
|                  | N1       | 28              | 18.79                      |
|                  | N2       | 21              | 14.09                      |
| TNM Stage IASLC  | I        | 81              | 54.36                      |
|                  | II       | 38              | 25.50                      |
|                  | III      | 30              | 20.13                      |
| Adjuvant Therapy | No       | 93              | 62.42                      |
|                  | Yes      | 56              | 37.58                      |
| Vital Status     | Alive    | 88              | 59.06                      |
|                  | Dead     | 61              | 40.94                      |
| Recurrence       | No       | 88              | 59.06                      |
|                  | Yes      | 61              | 40.94                      |

IASLC; International Association for the Study of Lung Cancer

**Supplementary Table 2. Association between markers' expression and lung adenocarcinoma patient's clinical and pathological characteristics (N=149)**

| <b>Marker</b>         | <b>Features</b>   | <b>Category</b> | <b>Cases N</b> | <b>Mean</b> | <b>Median</b> | <b>P Value</b> |
|-----------------------|-------------------|-----------------|----------------|-------------|---------------|----------------|
| <b><i>EZH2</i></b>    | Adjuvant Therapy  | No              | 93             | 2.1         | 1.4           | 0.905          |
|                       |                   | Yes             | 56             | 2.0         | 2.1           |                |
|                       | Gender            | Female          | 73             | 2.3         | 2.7           | 0.534          |
|                       |                   | Male            | 76             | 1.8         | 1.4           |                |
|                       | Smoking status    | Never           | 19             | 6.5         | 6.9           | <b>0.001*</b>  |
| Ever                  |                   | 130             | 1.4            | 1.1         |               |                |
| Tumor Size            | Tumor Size<=3.5cm | 84              | 3.1            | 3.4         | <b>0.049*</b> |                |
|                       | Tumor Size>3.5cm  | 65              | 0.7            | 0.7         |               |                |
| Age (Median)          | Age<=65           | 74              | 1.6            | 1.2         | 0.246         |                |
|                       | Age>65            | 75              | 2.5            | 3.8         |               |                |
| <b><i>miR-101</i></b> | Adjuvant Therapy  | No              | 93             | 7.8         | 8.0           | 0.624          |
|                       |                   | Yes             | 56             | 7.8         | 7.9           |                |
|                       | Gender            | Female          | 73             | 8.0         | 8.2           | <b>0.001*</b>  |
|                       |                   | Male            | 76             | 7.6         | 7.7           |                |
|                       | Smoking status    | Never           | 19             | 8.2         | 8.2           | <b>0.012*</b>  |
| Ever                  |                   | 130             | 7.8            | 7.9         |               |                |
| Tumor Size            | Tumor Size<=3.5cm | 84              | 7.8            | 8.1         | 0.293         |                |
|                       | Tumor Size>3.5cm  | 65              | 7.8            | 7.8         |               |                |
| Age (Median)          | Age<=65           | 74              | 7.9            | 8.0         | 0.284         |                |
|                       | Age>65            | 75              | 7.7            | 7.9         |               |                |

**Supplementary Table 3. Summary of Multivariate Analysis of Outcome in Lung Adenocarcinoma Patients by Adjuvant Chemotherapy and *EZH2*, *miR-101* and Combination of *EZH2/miR-101* Expression**

| <b>Recurrence-Free Survival</b>                                |                                                                       |                         |               |                |                            |               |                |
|----------------------------------------------------------------|-----------------------------------------------------------------------|-------------------------|---------------|----------------|----------------------------|---------------|----------------|
| <b>Multivariate Analysis</b>                                   |                                                                       | <b>Adjuvant Therapy</b> |               |                | <b>No Adjuvant Therapy</b> |               |                |
| <b>Parameter</b>                                               | <b>Categories</b>                                                     | <b>HR<sup>±</sup></b>   | <b>95%CI†</b> | <b>P value</b> | <b>HR<sup>±</sup></b>      | <b>95%CI†</b> | <b>P value</b> |
| <b><i>EZH2</i> Expression</b>                                  | Median                                                                | 1.559                   | 0.684; 3.552  | 0.290          | 0.909                      | 0.437         | 1.890          |
| Age                                                            | 1 Year Increase                                                       |                         |               |                |                            |               |                |
| TNM Stage IASLC                                                | III vs I                                                              | 2.959                   | 1.034; 8.466  | 0.043          | 7.518                      | 2.887         | 19.577         |
|                                                                | II vs I                                                               | 3.122                   | 0.985; 9.897  | 0.053          | 1.035                      | 0.428         | 2.502          |
| Tumor Size                                                     | Median (3.5 cm)                                                       |                         |               |                |                            |               |                |
| <b><i>miR-101</i> Expression</b>                               | Median                                                                | 2.400                   | 0.992; 5.810  | 0.052          | 0.621                      | 0.293; 1.314  | 0.212          |
| Age                                                            | 1 Year Increase                                                       |                         |               |                |                            |               |                |
| TNM Stage IASLC                                                | III vs I                                                              | 2.390                   | 0.823; 6.946  | 0.109          | 7.907                      | 3.083; 20.277 | <0.0001        |
|                                                                | II vs I                                                               | 3.270                   | 1.031; 10.378 | 0.044          | 1.059                      | 0.441; 2.541  | 0.898          |
| Tumor Size                                                     | Median (3.5 cm)                                                       |                         |               |                |                            |               |                |
| <b><i>EZH2</i><sup>High</sup>/<i>miR-101</i><sup>Low</sup></b> | <i>EZH2</i> <sup>High</sup> / <i>miR-101</i> <sup>Low</sup> vs Others | 1.915                   | 0.734; 4.993  | 0.184          | 0.470                      | 0.197; 1.119  | 0.088          |
| Age                                                            | Median                                                                |                         |               |                |                            |               |                |
| TNM Stage IASLC                                                | III vs I                                                              | 2.371                   | 0.773; 7.270  | 0.131          | 8.806                      | 3.383; 22.920 | <0.0001        |
|                                                                | II vs I                                                               | 2.779                   | 0.855; 9.027  | 0.089          | 1.045                      | 0.436; 2.504  | 0.921          |
| Tumor Size                                                     | Median (3.5 cm)                                                       |                         |               |                |                            |               |                |
| <b>Overall Survival</b>                                        |                                                                       |                         |               |                |                            |               |                |
| <b>Multivariate Analysis</b>                                   |                                                                       | <b>Adjuvant Therapy</b> |               |                | <b>No Adjuvant Therapy</b> |               |                |
| <b>Parameter</b>                                               | <b>Categories</b>                                                     | <b>HR<sup>±</sup></b>   | <b>95%CI†</b> | <b>P value</b> | <b>HR<sup>±</sup></b>      | <b>95%CI†</b> | <b>P value</b> |
| <b><i>EZH2</i> Expression</b>                                  | Median                                                                | 2.330                   | 0.956; 5.678  | 0.062          | 1.146                      | 0.545; 2.407  | 0.719          |
| Age                                                            | 1 Year Increase                                                       | 1.023                   | 0.979; 1.070  | 0.307          | 1.045                      | 1.003; 1.090  | 0.037          |
| TNM Stage IASLC                                                | III vs I                                                              | 10.929                  | 1.374; 86.967 | 0.023          | 4.423                      | 1.472; 13.388 | 0.008          |
|                                                                | II vs I                                                               | 8.117                   | 0.973; 67.734 | 0.053          | 0.940                      | 0.379; 2.333  | 0.893          |
| Tumor Size                                                     | Median (3.5 cm)                                                       | 1.281                   | 1.051; 1.562  | 0.014          | 1.172                      | 0.995; 1.380  | 0.057          |
| <b><i>miR-101</i> Expression</b>                               | Median                                                                | 0.529                   | 0.200; 1.397  | 0.198          | 0.984                      | 0.466; 2.075  | 0.965          |
| Age                                                            | 1 Year Increase                                                       | 1.022                   | 0.978; 1.067  | 0.330          | 1.045                      | 1.003; 1.090  | 0.036          |
| TNM Stage IASLC                                                | III vs I                                                              | 11.248                  | 1.427; 88.648 | 0.021          | 4.523                      | 1.497; 13.663 | 0.007          |
|                                                                | II vs I                                                               | 8.822                   | 1.055; 73.762 | 0.044          | 0.971                      | 0.397; 2.373  | 0.947          |
| Tumor Size                                                     | Median (3.5 cm)                                                       | 1.337                   | 1.104; 1.610  | 0.003          | 1.165                      | 0.990; 1.371  | 0.066          |
| <b><i>EZH2</i><sup>High</sup>/<i>miR-101</i><sup>Low</sup></b> | <i>EZH2</i> <sup>High</sup> / <i>miR-101</i> <sup>Low</sup> vs Others | 2.087                   | 0.814; 5.352  | 0.125          | 0.794                      | 0.341; 1.851  | 0.593          |
| Age                                                            | 1 year increase                                                       | 1.020                   | 0.977; 1.065  | 0.363          | 1.045                      | 1.003; 1.090  | 0.037          |
| TNM Stage IASLC                                                | III vs I                                                              | 9.174                   | 1.105; 76.148 | 0.040          | 4.849                      | 1.572; 14.955 | 0.006          |
|                                                                | II vs I                                                               | 7.280                   | 0.868; 61.046 | 0.067          | 1.013                      | 0.415; 2.273  | 0.978          |
| Tumor Size                                                     | Median (3.5 cm)                                                       | 1.277                   | 1.053; 1.548  | 0.013          | 1.150                      | 0.975; 1.355  | 0.096          |

<sup>±</sup>HR= Hazard ratio; CI†: confidence interval
